# Supplementary material for: Exploring the Potential of Lecanicillium aphanocladii AUMC-16936 as a Novel Microbial Cell Factory for the Biosynthesis of CuONPs Against Potato Fusarium Wilt
Source: Research Square preprint supplement (doi:10.21203/rs.3.rs-8360033/v1), 2025-12-22
Supplement: Supplementary file 1 [file b07d654c08eb8babf83b0c0f.docx]

**Table 1.** **Particular primers utilized in this research**

| Gene name | Abbreviation | Forward (F) and reverse (R) primer |
| --- | --- | --- |
| Reference gene | *ACTIN* | F: 5′-GGTAACATTGTGCTCAGTGGTGG-3′  R: 5′-AACGACCTTAATCTTCATGCTGC-3′ |
| Pathogenesis related protein | *PR-1b* | F: 5′-GGCATCCCGAGCACAAAAT-3′  R: 5′-CTGCACCGGAATGAATCAAGT-3′ |
| Box-transcription factor | *IbBBx24* | F: 5′-AAACGCACAATTGGAGCCAC-3′  R: 5′-GTAGGTCATCAACGGCCCAA-3′ |
| Protease inhibitor | *PIN2* | F: 5′-ATGAGCCCAAGGCAAATATGTAC-3′  R: 5′-GCCAATCCAGAAGATGGACAA-3′ |
| Chalcone isomerase | *CHI* | F: 5′-TGGTGGCCTAGACAACGATGAGTT-3′  R: TCACACTCCCAACTTGGTTTCCCT-3′ |
